# Supplementary material for: Construction of high protein-producing mutant yeast strains via point and structural mutageneses and their use for carotenoid production
Source: Research Square preprint supplement (doi:10.21203/rs.3.rs-5525851/v1), 2024-12-18
Supplement: Supplementary file 1 [file 6117cb2d56a4666d775a2195.docx]

Supplementary information

**Construction of high protein-producing mutant yeast strains via point and structural mutageneses and their use for carotenoid production**

Ryosuke Yamada, Yoshifumi Inoue, Yukino Karitani, Rumi Sakaguchi, Takuya Matsumoto, Hiroyasu Ogino

**Supplementary Table 1. YPH499Mu10G39 gene with increased expression level due to mutation**

| Gene or locus tag | Log2 (fold change) | -Log10 (p-value)a) |
| --- | --- | --- |
| EGO4 | 5.63 | 30.00 |
| tI(GAU)Q | 4.36 | 30.00 |
| YIG1 | 4.32 | 30.00 |
| HXT4 | 3.83 | 30.00 |
| DPC7 | 3.82 | 30.00 |
| YGR067C | 3.76 | 30.00 |
| ACS1 | 3.62 | 30.00 |
| RRT15 | 3.60 | 30.00 |
| JEN1 | 3.46 | 30.00 |
| SUF1 | 3.46 | 3.51 |
| YBR072C-A | 3.42 | 7.31 |
| HSP30 | 3.33 | 30.00 |
| CSM4 | 3.31 | 10.85 |
| tV(UAC)Q | 3.30 | 11.05 |
| ADY2 | 3.29 | 30.00 |
| SPG1 | 3.24 | 30.00 |
| NQM1 | 3.21 | 30.00 |
| YNCG0008W | 3.20 | 3.19 |
| MAL12 | 3.19 | 13.87 |
| tF(GAA)Q | 3.18 | 30.00 |
| YNL194C | 3.13 | 30.00 |
| MCH5 | 3.01 | 30.00 |
| DAK2 | 2.97 | 30.00 |
| YRO2 | 2.96 | 30.00 |
| tG(UCC)Q | 2.94 | 8.64 |
| SPI1 | 2.92 | 30.00 |
| ACH1 | 2.88 | 30.00 |
| SDH4 | 2.83 | 30.00 |
| STP4 | 2.81 | 30.00 |
| YOR268C | 2.80 | 16.43 |
| STF2 | 2.79 | 30.00 |
| YNCE0016C | 2.76 | 3.14 |
| YFL067W | 2.75 | 11.78 |
| tR(UCU)Q1 | 2.74 | 15.81 |
| YNL144C | 2.72 | 30.00 |
| ERR3 | 2.71 | 30.00 |
| SUR2 | 2.66 | 30.00 |
| SIP18 | 2.64 | 30.00 |
| HAP4 | 2.60 | 30.00 |
| GPX1 | 2.59 | 30.00 |
| tA(UGC)Q | 2.58 | 16.60 |
| VHS1 | 2.56 | 30.00 |
| SNR47 | 2.55 | 30.00 |
| CRS5 | 2.54 | 30.00 |
| HXK1 | 2.52 | 30.00 |
| SDH1 | 2.52 | 30.00 |
| ADH7 | 2.50 | 30.00 |
| tH(GUG)Q | 2.50 | 13.24 |
| YNCJ0023C | 2.46 | 16.18 |
| PIR3 | 2.45 | 30.00 |
| FMP45 | 2.44 | 30.00 |
| DDR2 | 2.43 | 30.00 |
| ATP18 | 2.42 | 30.00 |
| YNCE0008C | 2.41 | 3.05 |
| YNCN0007W | 2.39 | 2.58 |
| RGI1 | 2.38 | 30.00 |
| LDS2 | 2.34 | 21.60 |
| HXT7 | 2.33 | 30.00 |
| ROG3 | 2.32 | 30.00 |
| REG2 | 2.32 | 16.52 |
| STF1 | 2.31 | 30.00 |
| ATP16 | 2.31 | 30.00 |
| SDH3 | 2.31 | 30.00 |
| GAT2 | 2.30 | 30.00 |
| YBR200W-A | 2.30 | 7.71 |
| ATP19 | 2.28 | 30.00 |
| CIP1 | 2.26 | 9.66 |
| MDH1 | 2.24 | 30.00 |
| SNR19 | 2.24 | 30.00 |
| SNR59 | 2.23 | 30.00 |
| BI2 | 2.23 | 30.00 |
| GIS3 | 2.22 | 30.00 |
| tS(UGA)Q2 | 2.22 | 30.00 |
| DSF1 | 2.22 | 7.28 |
| PHD1 | 2.20 | 18.89 |
| CAT8 | 2.19 | 30.00 |
| MLS1 | 2.19 | 30.00 |
| BI3 | 2.18 | 30.00 |
| tQ(UUG)Q | 2.18 | 17.29 |
| YAP6 | 2.18 | 8.59 |
| SUT169 | 2.18 | 6.75 |
| MAL32 | 2.17 | 3.76 |
| SPS100 | 2.16 | 6.76 |
| HXT6 | 2.14 | 30.00 |
| FMP48 | 2.14 | 30.00 |
| SDH2 | 2.14 | 30.00 |
| IDP2 | 2.14 | 30.00 |
| ISF1 | 2.14 | 30.00 |
| PHM7 | 2.14 | 30.00 |
| PUT1 | 2.13 | 30.00 |
| YMR103C | 2.13 | 30.00 |
| ERR2 | 2.12 | 20.18 |
| YCL012C | 2.11 | 30.00 |
| CSR2 | 2.11 | 30.00 |
| BDH2 | 2.10 | 30.00 |
| ALD3 | 2.10 | 30.00 |
| UIP4 | 2.10 | 30.00 |
| GIP2 | 2.10 | 21.01 |
| YAT1 | 2.09 | 30.00 |
| CMC4 | 2.09 | 30.00 |
| YNL195C | 2.09 | 16.23 |
| tY(GUA)Q | 2.09 | 12.83 |
| MRK1 | 2.08 | 30.00 |
| MAL11 | 2.08 | 30.00 |
| PDH1 | 2.07 | 30.00 |
| BI4 | 2.05 | 30.00 |
| KGD1 | 2.04 | 30.00 |
| YJR096W | 2.04 | 30.00 |
| KGD2 | 2.03 | 30.00 |
| ATO2 | 2.03 | 30.00 |
| SNR5 | 2.01 | 30.00 |
| YMR206W | 2.00 | 6.49 |
| RRT6 | 1.98 | 11.35 |
| DMO1 | 1.97 | 30.00 |
| YGP1 | 1.97 | 30.00 |
| COB | 1.97 | 30.00 |
| SNF3 | 1.97 | 20.76 |
| AIM39 | 1.97 | 16.52 |
| SSE2 | 1.96 | 30.00 |
| PMC1 | 1.96 | 30.00 |
| QCR8 | 1.96 | 30.00 |
| TSL1 | 1.96 | 30.00 |
| ERR1 | 1.96 | 17.68 |
| tD(GUC)Q | 1.96 | 17.42 |
| YGL188C-A | 1.95 | 30.00 |
| FLO1 | 1.94 | 13.24 |
| GCY1 | 1.93 | 30.00 |
| GAC1 | 1.93 | 30.00 |
| YPK2 | 1.92 | 30.00 |
| AI1 | 1.92 | 30.00 |
| SPL2 | 1.92 | 4.21 |
| IMA4 | 1.92 | 2.86 |
| SNR161 | 1.91 | 30.00 |
| SNR80 | 1.91 | 30.00 |
| MEF2 | 1.91 | 30.00 |
| tT(UAG)Q2 | 1.91 | 30.00 |
| AQY3 | 1.90 | 30.00 |
| MPC3 | 1.90 | 30.00 |
| BSC1 | 1.90 | 15.88 |
| YDR018C | 1.90 | 11.41 |
| tP(UGG)Q | 1.89 | 30.00 |
| MIN10 | 1.89 | 13.85 |
| PBI2 | 1.88 | 30.00 |
| OM14 | 1.87 | 30.00 |
| ATH1 | 1.87 | 30.00 |
| HSP26 | 1.86 | 30.00 |
| MSC1 | 1.86 | 30.00 |
| ATP2 | 1.84 | 30.00 |
| ICL1 | 1.83 | 30.00 |
| YMR31 | 1.83 | 30.00 |
| YHR033W | 1.83 | 30.00 |
| tK(UUU)Q | 1.83 | 30.00 |
| AI2 | 1.82 | 30.00 |
| UBP9 | 1.82 | 21.01 |
| GPG1 | 1.81 | 30.00 |
| COX7 | 1.81 | 30.00 |
| CIT1 | 1.81 | 30.00 |
| AI3 | 1.80 | 30.00 |
| YGR174W-A | 1.79 | 30.00 |
| MAL31 | 1.79 | 18.65 |
| YBR284W | 1.79 | 6.27 |
| NDI1 | 1.78 | 30.00 |
| RGM1 | 1.78 | 21.43 |
| YDR215C | 1.78 | 4.77 |
| HSP12 | 1.77 | 30.00 |
| OM45 | 1.77 | 30.00 |
| YLR154C-G | 1.77 | 30.00 |
| RDN58-2 | 1.77 | 30.00 |
| YLR152C | 1.77 | 21.26 |
| tT(UGU)Q1 | 1.77 | 7.54 |
| PHM6 | 1.76 | 3.59 |
| CAT2 | 1.75 | 30.00 |
| AI4 | 1.75 | 30.00 |
| YPT53 | 1.75 | 15.78 |
| IML2 | 1.74 | 30.00 |
| COX1 | 1.74 | 30.00 |
| GLK1 | 1.73 | 30.00 |
| AI5 ALPHA | 1.73 | 30.00 |
| TLC1 | 1.72 | 30.00 |
| SNR9 | 1.72 | 30.00 |
| tN(GUU)Q | 1.72 | 13.49 |
| MMO1 | 1.72 | 6.28 |
| YBR090C | 1.71 | 30.00 |
| SNR39 | 1.71 | 30.00 |
| HMS1 | 1.71 | 21.42 |
| BXI1 | 1.70 | 30.00 |
| RPM1 | 1.70 | 30.00 |
| MPM1 | 1.70 | 22.05 |
| SRC1 | 1.69 | 21.40 |
| YOR343C | 1.69 | 7.07 |
| ADR1 | 1.68 | 30.00 |
| ATP5 | 1.68 | 30.00 |
| SNR8 | 1.68 | 30.00 |
| HXT5 | 1.67 | 30.00 |
| YDR278C | 1.67 | 3.57 |
| RRT1 | 1.66 | 30.00 |
| TAR1 | 1.66 | 30.00 |
| SNR31 | 1.66 | 30.00 |
| SNR45 | 1.66 | 30.00 |
| EMI2 | 1.66 | 19.08 |
| SNR128 | 1.65 | 30.00 |
| YNK1 | 1.65 | 30.00 |
| YPR127W | 1.65 | 30.00 |
| YLR162W | 1.65 | 18.13 |
| RDN58-1 | 1.64 | 30.00 |
| GSY2 | 1.64 | 30.00 |
| MDH2 | 1.64 | 30.00 |
| MND1 | 1.64 | 14.63 |
| ARG82 | 1.64 | 9.23 |
| MOH1 | 1.63 | 30.00 |
| UBC9 | 1.63 | 14.04 |
| RGI2 | 1.63 | 2.64 |
| PDR15 | 1.62 | 17.17 |
| PXA1 | 1.62 | 7.86 |
| PNC1 | 1.61 | 30.00 |
| ATP3 | 1.60 | 30.00 |
| SPG4 | 1.60 | 30.00 |
| RCI50 | 1.60 | 9.00 |
| SDH9 | 1.60 | 2.89 |
| PSK1 | 1.59 | 30.00 |
| ATP15 | 1.59 | 30.00 |
| SKS1 | 1.59 | 30.00 |
| YMR181C | 1.59 | 24.19 |
| IGD1 | 1.59 | 17.27 |
| GIN4 | 1.59 | 12.90 |
| YCL042W | 1.58 | 30.00 |
| SAT4 | 1.58 | 30.00 |
| SAP155 | 1.58 | 30.00 |
| QCR10 | 1.58 | 30.00 |
| PGM2 | 1.58 | 30.00 |
| GPH1 | 1.58 | 30.00 |
| AFR1 | 1.58 | 15.18 |
| COX17 | 1.57 | 24.74 |
| YLR177W | 1.57 | 19.46 |
| ALT2 | 1.57 | 12.15 |
| SNR18 | 1.56 | 30.00 |
| HXK2 | 1.56 | 30.00 |
| RDN18-1 | 1.56 | 30.00 |
| PIN3 | 1.56 | 13.85 |
| MGA1 | 1.56 | 7.66 |
| PLB3 | 1.55 | 30.00 |
| OLI1 | 1.55 | 30.00 |
| RPR1 | 1.54 | 30.00 |
| PDE1 | 1.54 | 30.00 |
| NNK1 | 1.54 | 17.35 |
| tL(UAA)Q | 1.54 | 17.21 |
| WHI5 | 1.54 | 11.30 |
| YER158C | 1.54 | 7.52 |
| RDN18-2 | 1.53 | 30.00 |
| RPM2 | 1.53 | 30.00 |
| YHL008C | 1.53 | 23.68 |
| YOL038C-A | 1.53 | 3.97 |
| SNR85 | 1.52 | 30.00 |
| YMR114C | 1.52 | 13.28 |
| RTN2 | 1.52 | 11.55 |
| SEF1 | 1.52 | 9.85 |
| tS(GCU)Q1 | 1.52 | 4.31 |
| CIT2 | 1.51 | 30.00 |
| ATG39 | 1.51 | 30.00 |
| TMA10 | 1.51 | 30.00 |
| COQ21 | 1.51 | 14.16 |
| PIG2 | 1.51 | 10.36 |
| DSE4 | 1.51 | 6.14 |
| TDA6 | 1.50 | 6.57 |
| TRX3 | 1.49 | 30.00 |
| GLC3 | 1.49 | 30.00 |
| COX2 | 1.49 | 30.00 |
| FBP1 | 1.49 | 7.63 |
| RIE1 | 1.48 | 30.00 |
| APJ1 | 1.48 | 30.00 |
| MIN8 | 1.48 | 30.00 |
| MNN4 | 1.48 | 15.81 |
| SNR13 | 1.47 | 25.16 |
| COQ5 | 1.47 | 21.39 |
| CMC2 | 1.47 | 15.49 |
| tM(CAU)Q1 | 1.47 | 11.11 |
| MEO1 | 1.46 | 30.00 |
| MTH1 | 1.46 | 30.00 |
| ORF1 | 1.46 | 30.00 |
| BOP2 | 1.46 | 9.41 |
| YKL102C | 1.46 | 6.55 |
| YDR344C | 1.46 | 3.25 |
| GLC7 | 1.45 | 30.00 |
| YET2 | 1.45 | 14.85 |
| FRT2 | 1.45 | 2.27 |
| INH1 | 1.44 | 30.00 |
| FMP16 | 1.44 | 30.00 |
| TUF1 | 1.44 | 30.00 |
| PCD1 | 1.44 | 4.57 |
| MIC10 | 1.43 | 30.00 |
| RTC3 | 1.43 | 30.00 |
| SUR1 | 1.43 | 30.00 |
| ICS2 | 1.43 | 12.65 |
| COM2 | 1.42 | 30.00 |
| ATP4 | 1.42 | 30.00 |
| KIN82 | 1.42 | 10.08 |
| tR(ACG)Q2 | 1.42 | 2.24 |
| HXT3 | 1.41 | 30.00 |
| AGX1 | 1.41 | 30.00 |
| COX3 | 1.41 | 30.00 |
| FIS1 | 1.41 | 22.09 |
| PAL2 | 1.41 | 19.47 |
| SFC1 | 1.41 | 8.65 |
| YMR317W | 1.41 | 6.48 |
| PST1 | 1.40 | 30.00 |
| COX5B | 1.40 | 30.00 |
| ATP14 | 1.40 | 30.00 |
| TOS3 | 1.40 | 8.41 |
| MTL1 | 1.40 | 5.30 |
| BAP3 | 1.39 | 30.00 |
| RDN25-1 | 1.39 | 30.00 |
| SLM3 | 1.39 | 14.99 |
| SPS19 | 1.39 | 9.99 |
| FBP26 | 1.38 | 30.00 |
| IDH2 | 1.38 | 30.00 |
| CAR1 | 1.38 | 30.00 |
| MIX14 | 1.38 | 12.42 |
| SNR65 | 1.38 | 8.29 |
| IAI11 | 1.38 | 6.67 |
| YKL162C | 1.38 | 5.80 |
| MIT1 | 1.38 | 2.07 |
| BDH1 | 1.37 | 30.00 |
| PRX1 | 1.37 | 30.00 |
| RHO5 | 1.37 | 30.00 |
| SNR39B | 1.37 | 23.59 |
| MIN3 | 1.37 | 20.76 |
| YBL086C | 1.37 | 10.62 |
| PRR2 | 1.37 | 7.10 |
| GRE1 | 1.37 | 6.96 |
| SNR60 | 1.36 | 6.92 |
| COX9 | 1.35 | 30.00 |
| RDN25-2 | 1.35 | 30.00 |
| GTF1 | 1.35 | 24.79 |
| COX20 | 1.35 | 18.82 |
| RDL1 | 1.34 | 30.00 |
| ODC1 | 1.34 | 13.46 |
| CAF120 | 1.34 | 8.24 |
| YJR115W | 1.33 | 8.60 |
| FUN19 | 1.33 | 6.40 |
| ICL2 | 1.33 | 5.70 |
| SNR53 | 1.33 | 4.21 |
| PAU5 | 1.33 | 3.42 |
| PAI3 | 1.32 | 30.00 |
| SNR83 | 1.32 | 30.00 |
| SNR79 | 1.32 | 19.69 |
| GID11 | 1.32 | 15.99 |
| VHS3 | 1.32 | 13.91 |
| SNR82 | 1.31 | 30.00 |
| HSP104 | 1.31 | 30.00 |
| TPS2 | 1.31 | 25.48 |
| MDM32 | 1.31 | 17.46 |
| MAG1 | 1.31 | 15.35 |
| PFK26 | 1.31 | 10.78 |
| SFL1 | 1.31 | 5.39 |
| ATP17 | 1.30 | 30.00 |
| YOR316C-A | 1.30 | 9.26 |
| ATG2 | 1.30 | 7.23 |
| YGL036W | 1.30 | 6.73 |
| AIM23 | 1.30 | 6.60 |
| MAY24 | 1.30 | 5.93 |
| YHL050C | 1.30 | 4.23 |
| YMR272W-B | 1.30 | 2.01 |
| YDL124W | 1.29 | 30.00 |
| GLO1 | 1.29 | 30.00 |
| FLC1 | 1.29 | 30.00 |
| TPO4 | 1.29 | 25.40 |
| CAR2 | 1.29 | 23.51 |
| ATP1 | 1.28 | 30.00 |
| LSR1 | 1.28 | 30.00 |
| YPL247C | 1.28 | 7.46 |
| YPL261C | 1.28 | 4.46 |
| EGT2 | 1.28 | 2.10 |
| YBR085C-A | 1.27 | 30.00 |
| SNR4 | 1.27 | 30.00 |
| YHR138C | 1.27 | 30.00 |
| SNR34 | 1.27 | 30.00 |
| HPF1 | 1.27 | 30.00 |
| NAB3 | 1.27 | 19.41 |
| tE(UUC)Q | 1.27 | 9.07 |
| COX11 | 1.27 | 7.34 |
| YBR285W | 1.27 | 7.19 |
| EDS1 | 1.27 | 6.52 |
| BDF2 | 1.26 | 30.00 |
| PIC2 | 1.26 | 30.00 |
| FUM1 | 1.26 | 30.00 |
| MSN4 | 1.26 | 26.52 |
| CIT3 | 1.26 | 13.99 |
| TOP3 | 1.26 | 7.44 |
| MLH3 | 1.26 | 6.66 |
| UBC8 | 1.25 | 30.00 |
| COA3 | 1.25 | 26.95 |
| GIS4 | 1.25 | 13.60 |
| MCP1 | 1.25 | 10.28 |
| ECM8 | 1.25 | 4.54 |
| ATG8 | 1.24 | 30.00 |
| SNR84 | 1.24 | 30.00 |
| GLC8 | 1.24 | 30.00 |
| CRC1 | 1.24 | 30.00 |
| SDH6 | 1.24 | 11.52 |
| NFI1 | 1.24 | 7.18 |
| ZRG8 | 1.24 | 5.20 |
| DSE1 | 1.24 | 4.11 |
| tC(GCA)Q | 1.24 | 2.59 |
| SNR62 | 1.23 | 20.67 |
| YGR127W | 1.23 | 17.38 |
| GSM1 | 1.23 | 10.68 |
| ECM3 | 1.23 | 9.82 |
| IRC13 | 1.23 | 7.21 |
| IDH1 | 1.22 | 19.95 |
| MRPL39 | 1.22 | 17.98 |
| DBP1 | 1.22 | 16.51 |
| YNL018C | 1.22 | 4.08 |
| YPL113C | 1.22 | 3.72 |
| YPS5 | 1.22 | 2.99 |
| ATP7 | 1.21 | 30.00 |
| HSP10 | 1.21 | 30.00 |
| GRE3 | 1.21 | 14.37 |
| TYE7 | 1.21 | 9.53 |
| ISR1 | 1.21 | 4.43 |
| CYC7 | 1.20 | 30.00 |
| MDM35 | 1.20 | 23.02 |
| PIB1 | 1.20 | 15.21 |
| NGL3 | 1.20 | 8.63 |
| MAM33 | 1.20 | 7.16 |
| YMR175W-A | 1.20 | 3.11 |
| QCR7 | 1.19 | 30.00 |
| AIM33 | 1.19 | 8.50 |
| DOT6 | 1.19 | 4.16 |
| YFL019C | 1.19 | 3.96 |
| TIM11 | 1.18 | 30.00 |
| COT1 | 1.18 | 22.52 |
| SWR1 | 1.18 | 14.72 |
| ATG18 | 1.18 | 6.31 |
| RCH1 | 1.18 | 5.03 |
| YLR122C | 1.18 | 4.90 |
| GIP3 | 1.17 | 30.00 |
| HMRA1 | 1.17 | 23.38 |
| TOS8 | 1.17 | 13.81 |
| SPC105 | 1.17 | 10.61 |
| YMR105W-A | 1.17 | 7.01 |
| SNR54 | 1.17 | 5.12 |
| SDS24 | 1.17 | 4.88 |
| SNR32 | 1.16 | 30.00 |
| RPS27A | 1.16 | 30.00 |
| TRS23 | 1.16 | 12.01 |
| NCE101 | 1.16 | 10.72 |
| YFL051C | 1.16 | 8.41 |
| MPT5 | 1.16 | 6.10 |
| COA4 | 1.16 | 4.57 |
| YNL277W-A | 1.16 | 2.85 |
| DCS1 | 1.15 | 22.68 |
| GUT1 | 1.15 | 13.89 |
| CMI8 | 1.15 | 10.55 |
| PET494 | 1.15 | 9.18 |
| YCL048W-A | 1.15 | 3.86 |
| YHR139C-A | 1.15 | 3.20 |
| UTR5 | 1.15 | 2.78 |
| ATP8 | 1.14 | 30.00 |
| PEX30 | 1.14 | 10.98 |
| LCL1 | 1.14 | 10.83 |
| MIH1 | 1.14 | 5.43 |
| HEM13 | 1.14 | 4.34 |
| YCL001W-B | 1.14 | 4.11 |
| YAR068W | 1.14 | 3.93 |
| YER121W | 1.14 | 3.41 |
| SNA3 | 1.13 | 30.00 |
| BAG7 | 1.13 | 13.29 |
| YOR289W | 1.13 | 12.20 |
| MIG1 | 1.13 | 12.09 |
| DUF1 | 1.13 | 7.45 |
| YML6 | 1.13 | 5.97 |
| WSC2 | 1.13 | 4.40 |
| HRK1 | 1.12 | 12.21 |
| AMS1 | 1.12 | 10.34 |
| YDL012C | 1.12 | 9.73 |
| OPT1 | 1.12 | 8.43 |
| VAR1 | 1.12 | 7.10 |
| FOX2 | 1.12 | 4.82 |
| YPR078C | 1.12 | 3.76 |
| RPL39 | 1.11 | 30.00 |
| ICY1 | 1.11 | 30.00 |
| PDC5 | 1.11 | 16.35 |
| STE24 | 1.11 | 7.09 |
| SNR46 | 1.10 | 30.00 |
| RDN37-1 | 1.10 | 30.00 |
| HOR7 | 1.10 | 30.00 |
| SNR70 | 1.10 | 30.00 |
| AIM17 | 1.10 | 22.65 |
| SPG5 | 1.10 | 20.82 |
| AMN1 | 1.10 | 3.01 |
| TDA3 | 1.09 | 16.74 |
| UPC2 | 1.09 | 9.45 |
| GIS1 | 1.09 | 9.00 |
| SCS22 | 1.09 | 7.41 |
| RDN37-2 | 1.08 | 30.00 |
| AGP2 | 1.08 | 19.73 |
| QRI5 | 1.08 | 9.80 |
| RDS2 | 1.08 | 6.05 |
| SCO2 | 1.08 | 4.80 |
| PXP1 | 1.08 | 4.77 |
| PMP3 | 1.07 | 30.00 |
| SNR41 | 1.07 | 30.00 |
| ATP6 | 1.07 | 30.00 |
| DCS2 | 1.07 | 18.85 |
| RME1 | 1.07 | 15.68 |
| BCK2 | 1.07 | 15.58 |
| GPR1 | 1.07 | 14.78 |
| COX19 | 1.07 | 11.76 |
| APE4 | 1.07 | 8.99 |
| YKL091C | 1.07 | 5.65 |
| DIA3 | 1.07 | 5.04 |
| FMP33 | 1.07 | 4.58 |
| RSB1 | 1.07 | 4.38 |
| AHT1 | 1.07 | 4.17 |
| YFL066C | 1.07 | 3.13 |
| YNL034W | 1.07 | 3.07 |
| RPS9A | 1.06 | 23.18 |
| RGS2 | 1.06 | 10.85 |
| FMP10 | 1.06 | 10.67 |
| CPR3 | 1.06 | 9.36 |
| SNR75 | 1.06 | 9.25 |
| CDC27 | 1.06 | 5.55 |
| MRPL19 | 1.06 | 2.56 |
| SNR37 | 1.05 | 30.00 |
| SNR17A | 1.05 | 30.00 |
| NCE102 | 1.05 | 30.00 |
| COX14 | 1.05 | 15.51 |
| HAL5 | 1.05 | 14.56 |
| VID30 | 1.05 | 4.86 |
| YML053C | 1.05 | 3.77 |
| PHM8 | 1.04 | 20.41 |
| SMF3 | 1.04 | 6.43 |
| ATG9 | 1.04 | 5.71 |
| USV1 | 1.04 | 4.29 |
| GLG2 | 1.04 | 3.93 |
| IRC16 | 1.04 | 3.92 |
| YAR029W | 1.04 | 3.62 |
| UBP11 | 1.04 | 3.53 |
| SNR81 | 1.03 | 19.80 |
| AVT3 | 1.03 | 13.68 |
| MRPL33 | 1.03 | 10.44 |
| ATG15 | 1.03 | 9.71 |
| CIN5 | 1.03 | 7.35 |
| IKS1 | 1.03 | 5.20 |
| SLZ1 | 1.03 | 2.42 |
| MSL5 | 1.03 | 2.09 |
| PHB1 | 1.02 | 18.36 |
| YKL104W-A | 1.02 | 16.90 |
| NYV1 | 1.02 | 15.13 |
| SDH8 | 1.02 | 13.23 |
| MCM1 | 1.02 | 12.24 |
| YLR345W | 1.02 | 10.88 |
| RRT8 | 1.02 | 5.75 |
| YAL064W-B | 1.02 | 4.93 |
| YOR342C | 1.02 | 3.11 |
| XKS1 | 1.02 | 2.18 |
| HSP60 | 1.01 | 30.00 |
| SWH1 | 1.01 | 7.92 |
| PHO23 | 1.01 | 7.06 |
| CMR3 | 1.01 | 5.25 |
| PKH2 | 1.01 | 5.07 |
| TAX4 | 1.01 | 4.09 |
| YGL088W | 1.00 | 30.00 |
| SNR10 | 1.00 | 30.00 |
| NCB2 | 1.00 | 12.59 |
| IWR1 | 1.00 | 10.13 |
| SLX5 | 1.00 | 9.14 |
| MRPL28 | 1.00 | 6.41 |
| YGL006W-A | 1.00 | 5.97 |
| CTS1 | 1.00 | 4.93 |

a) -Log10 (p-value) greater than 30 is indicated as 30.

**Supplementary Table 2. YPH499Mu10G39 gene with decreased expression level due to mutation**

| Gene or locus tag | Log2 (fold change) | -Log10 (p-value)a) |
| --- | --- | --- |
| FRM2 | -5.71 | 30.00 |
| YNCL0009C | -5.06 | 30.00 |
| SUP6 | -4.11 | 30.00 |
| ERG6 | -3.89 | 30.00 |
| ERG13 | -3.87 | 30.00 |
| YNCK0005C | -3.87 | 7.43 |
| THI12 | -3.81 | 13.19 |
| ZPS1 | -3.73 | 30.00 |
| ANS1 | -3.71 | 2.34 |
| THI5 | -3.70 | 5.19 |
| ERG5 | -3.62 | 30.00 |
| YHR125W | -3.55 | 8.82 |
| YNCD0017W | -3.52 | 30.00 |
| DAL5 | -3.37 | 30.00 |
| ERG2 | -3.30 | 30.00 |
| ERG10 | -3.25 | 30.00 |
| YNCK0012C | -3.22 | 14.84 |
| YNCC0005W | -3.16 | 3.25 |
| SUP53 | -3.16 | 2.29 |
| ERG26 | -3.14 | 30.00 |
| HMG1 | -3.10 | 30.00 |
| YNCE0018W | -3.03 | 2.85 |
| YNCD0016C | -3.02 | 8.66 |
| YNCJ0017C | -3.02 | 2.81 |
| YER138W-A | -2.99 | 30.00 |
| YNCH0002C | -2.95 | 5.58 |
| DCG1 | -2.93 | 13.74 |
| DUR3 | -2.89 | 30.00 |
| FRE1 | -2.88 | 30.00 |
| YNCD0023C | -2.87 | 11.65 |
| YNCN0011W | -2.87 | 3.83 |
| YNCE0010W | -2.87 | 2.53 |
| ERG1 | -2.86 | 30.00 |
| YCR102C | -2.86 | 16.23 |
| YNCD0020W | -2.85 | 30.00 |
| MVD1 | -2.83 | 30.00 |
| SPO74 | -2.79 | 5.07 |
| YNCF0011C | -2.76 | 6.35 |
| NDJ1 | -2.75 | 12.49 |
| YJL028W | -2.73 | 2.89 |
| ATR1 | -2.72 | 30.00 |
| CYB5 | -2.72 | 30.00 |
| ACS2 | -2.62 | 30.00 |
| DAL4 | -2.62 | 18.91 |
| YNCD0013C | -2.58 | 5.09 |
| YMR244W | -2.55 | 30.00 |
| SHM2 | -2.54 | 30.00 |
| DPA10 | -2.54 | 30.00 |
| EMA19 | -2.52 | 30.00 |
| PAU4 | -2.51 | 4.21 |
| YNCH0010C | -2.51 | 2.01 |
| MTD1 | -2.50 | 30.00 |
| ERG20 | -2.48 | 30.00 |
| DAL7 | -2.47 | 30.00 |
| ERG24 | -2.47 | 30.00 |
| ERG12 | -2.45 | 30.00 |
| AIF1 | -2.44 | 30.00 |
| ADE1 | -2.43 | 30.00 |
| YNCP0019W | -2.42 | 30.00 |
| ADH6 | -2.39 | 30.00 |
| YLR460C | -2.39 | 17.14 |
| ARG8 | -2.37 | 30.00 |
| YLL053C | -2.36 | 30.00 |
| SUP61 | -2.35 | 4.04 |
| ERG25 | -2.34 | 30.00 |
| YGR266W | -2.33 | 30.00 |
| CRR1 | -2.31 | 7.79 |
| YNCG0046W | -2.29 | 2.60 |
| ERG11 | -2.27 | 30.00 |
| ADE17 | -2.27 | 30.00 |
| CIS1 | -2.26 | 30.00 |
| YOR192C-A | -2.26 | 30.00 |
| PMA2 | -2.26 | 30.00 |
| DAL1 | -2.25 | 5.93 |
| SUP16 | -2.24 | 5.19 |
| YHI9 | -2.22 | 30.00 |
| ERG7 | -2.20 | 30.00 |
| YOR192C-B | -2.19 | 30.00 |
| AQY2 | -2.18 | 30.00 |
| ERG27 | -2.18 | 30.00 |
| AAD4 | -2.16 | 19.75 |
| DUR12 | -2.14 | 30.00 |
| YDR261W-B | -2.14 | 30.00 |
| ADE13 | -2.14 | 30.00 |
| HXT2 | -2.14 | 30.00 |
| IZH4 | -2.14 | 8.64 |
| RIX1 | -2.13 | 30.00 |
| VEL1 | -2.13 | 5.41 |
| ERG29 | -2.12 | 30.00 |
| SNZ1 | -2.11 | 30.00 |
| YNCO0019W | -2.09 | 15.35 |
| YHB1 | -2.07 | 30.00 |
| TDH2 | -2.06 | 30.00 |
| YNCG0040C | -2.06 | 17.90 |
| SPR28 | -2.06 | 2.08 |
| YNCN0003W | -2.05 | 8.09 |
| GPX2 | -2.04 | 30.00 |
| SAM2 | -2.04 | 30.00 |
| YBL100W-A | -2.04 | 18.24 |
| TNA1 | -2.03 | 30.00 |
| ADE57 | -2.02 | 30.00 |
| YOR387C | -2.02 | 8.03 |
| SER1 | -2.01 | 30.00 |
| YBR242W | -2.00 | 30.00 |
| DAL3 | -1.99 | 30.00 |
| YEH1 | -1.98 | 30.00 |
| YBL100W-B | -1.98 | 18.52 |
| SKG6 | -1.98 | 8.69 |
| TPI1 | -1.97 | 30.00 |
| YGK1 | -1.96 | 30.00 |
| SCW4 | -1.96 | 18.94 |
| DUT1 | -1.96 | 15.73 |
| YDR210W-B | -1.95 | 20.53 |
| IMD3 | -1.94 | 30.00 |
| RRP1 | -1.93 | 30.00 |
| SUE1 | -1.93 | 30.00 |
| RNH203 | -1.93 | 14.11 |
| URA7 | -1.92 | 30.00 |
| MSC7 | -1.92 | 30.00 |
| ARE2 | -1.91 | 30.00 |
| HPA2 | -1.90 | 30.00 |
| GCV2 | -1.88 | 30.00 |
| SAH1 | -1.87 | 30.00 |
| HMX1 | -1.87 | 30.00 |
| SPS1 | -1.87 | 2.10 |
| YCR087C-A | -1.86 | 30.00 |
| UGA4 | -1.86 | 30.00 |
| MTC7 | -1.83 | 30.00 |
| GTT2 | -1.83 | 30.00 |
| ADE2 | -1.83 | 30.00 |
| YLR410W-B | -1.83 | 20.09 |
| YDR261W-A | -1.82 | 19.13 |
| NNF1 | -1.82 | 11.11 |
| SUP2 | -1.82 | 3.18 |
| TSA1 | -1.81 | 30.00 |
| YKL096C-B | -1.80 | 2.98 |
| ARG56 | -1.79 | 30.00 |
| FAS1 | -1.79 | 30.00 |
| TAH18 | -1.79 | 30.00 |
| YOR343W-B | -1.79 | 17.06 |
| YNCG0036W | -1.79 | 2.37 |
| ADO1 | -1.78 | 30.00 |
| YPR014C | -1.78 | 4.10 |
| YDL086W | -1.77 | 30.00 |
| YVH1 | -1.77 | 18.90 |
| FBA1 | -1.76 | 30.00 |
| SDT1 | -1.75 | 30.00 |
| YBR196C-A | -1.75 | 2.20 |
| HIS5 | -1.74 | 30.00 |
| YFL002W-A | -1.73 | 30.00 |
| YGR161W-B | -1.71 | 30.00 |
| IDI1 | -1.71 | 30.00 |
| NOP9 | -1.71 | 20.88 |
| SDL1 | -1.71 | 16.20 |
| YOL029C | -1.71 | 14.90 |
| TCA17 | -1.71 | 7.89 |
| ERG3 | -1.70 | 30.00 |
| GFD2 | -1.70 | 18.24 |
| YAP7 | -1.70 | 13.73 |
| HUG1 | -1.70 | 2.82 |
| RPL4A | -1.69 | 30.00 |
| GUA1 | -1.67 | 30.00 |
| YLR410W-A | -1.67 | 17.62 |
| YCL019W | -1.66 | 18.15 |
| YFL002W-B | -1.65 | 30.00 |
| ARO8 | -1.65 | 30.00 |
| GAP1 | -1.65 | 30.00 |
| RSN1 | -1.65 | 30.00 |
| YDR210W-A | -1.65 | 10.41 |
| ERG28 | -1.64 | 30.00 |
| YGR161W-A | -1.64 | 30.00 |
| ARG3 | -1.64 | 30.00 |
| LYS9 | -1.64 | 30.00 |
| URB1 | -1.64 | 17.36 |
| YDR034C-D | -1.63 | 16.72 |
| ADI1 | -1.62 | 30.00 |
| VBA1 | -1.62 | 30.00 |
| ARG1 | -1.62 | 30.00 |
| YPR158C-D | -1.62 | 30.00 |
| LYS1 | -1.61 | 30.00 |
| YJR027W | -1.61 | 30.00 |
| URA3 | -1.61 | 13.81 |
| YLR157C-B | -1.60 | 30.00 |
| YOL103W-A | -1.60 | 30.00 |
| YAR009C | -1.59 | 30.00 |
| YDR210C-D | -1.59 | 30.00 |
| HRP1 | -1.59 | 30.00 |
| RKI1 | -1.59 | 16.80 |
| YDR098C-B | -1.58 | 30.00 |
| YLR227W-B | -1.58 | 30.00 |
| YOL103W-B | -1.58 | 30.00 |
| ETT1 | -1.58 | 30.00 |
| YPL257W-B | -1.58 | 30.00 |
| YNCM0009C | -1.58 | 3.63 |
| GGC1 | -1.57 | 30.00 |
| YML039W | -1.57 | 30.00 |
| YPR137C-B | -1.56 | 30.00 |
| YPR158W-B | -1.56 | 30.00 |
| YDR261C-D | -1.55 | 30.00 |
| YDR316W-B | -1.55 | 30.00 |
| AAD6 | -1.55 | 30.00 |
| YGR038C-B | -1.55 | 30.00 |
| TCB2 | -1.55 | 30.00 |
| YFR018C | -1.55 | 17.92 |
| ECM1 | -1.55 | 16.16 |
| MRI1 | -1.55 | 11.95 |
| IMD2 | -1.55 | 10.07 |
| YOR192C-C | -1.55 | 8.44 |
| YER138C | -1.54 | 30.00 |
| ARG4 | -1.54 | 30.00 |
| YLR035C-A | -1.54 | 30.00 |
| YNL284C-B | -1.54 | 30.00 |
| ENB1 | -1.54 | 10.58 |
| IMT4 | -1.54 | 5.72 |
| YNCJ0002C | -1.54 | 3.11 |
| ENO2 | -1.53 | 30.00 |
| YML040W | -1.53 | 30.00 |
| YPL257W-A | -1.53 | 30.00 |
| YDR365W-B | -1.52 | 30.00 |
| ADE6 | -1.52 | 30.00 |
| YHR214C-C | -1.52 | 30.00 |
| YJR026W | -1.52 | 30.00 |
| GCV1 | -1.51 | 30.00 |
| GUK1 | -1.51 | 30.00 |
| ZRT1 | -1.51 | 30.00 |
| YHR214C-B | -1.51 | 30.00 |
| YML045W | -1.51 | 30.00 |
| RIX7 | -1.51 | 20.08 |
| YTM1 | -1.51 | 18.17 |
| CYB2 | -1.51 | 18.16 |
| FAL1 | -1.51 | 9.62 |
| CDC21 | -1.51 | 2.86 |
| DUN1 | -1.51 | 2.06 |
| YDR365W-A | -1.50 | 30.00 |
| IZH1 | -1.50 | 30.00 |
| YGR038C-A | -1.50 | 30.00 |
| ERG9 | -1.50 | 30.00 |
| YLR157C-A | -1.50 | 30.00 |
| YLR256W-A | -1.50 | 30.00 |
| YMR050C | -1.50 | 30.00 |
| YPR137C-A | -1.50 | 30.00 |
| YNL035C | -1.50 | 11.34 |
| YDR042C | -1.50 | 2.35 |
| HYP2 | -1.49 | 30.00 |
| YGR027W-B | -1.49 | 30.00 |
| YOR142W-B | -1.49 | 30.00 |
| HRI1 | -1.49 | 22.44 |
| FTR1 | -1.49 | 16.86 |
| INA1 | -1.49 | 14.58 |
| YAR010C | -1.48 | 30.00 |
| HIS7 | -1.48 | 30.00 |
| YDR261C-C | -1.48 | 30.00 |
| YER137C-A | -1.48 | 30.00 |
| YGR027W-A | -1.48 | 30.00 |
| YLR227W-A | -1.48 | 30.00 |
| NIP7 | -1.48 | 30.00 |
| TED1 | -1.48 | 13.20 |
| BUD31 | -1.48 | 10.11 |
| YOR343W-A | -1.48 | 7.24 |
| YLR157W-E | -1.48 | 3.11 |
| NTF2 | -1.47 | 30.00 |
| YJR028W | -1.47 | 30.00 |
| DBP9 | -1.47 | 30.00 |
| YPR158C-C | -1.47 | 30.00 |
| DLD2 | -1.47 | 22.28 |
| HIF1 | -1.47 | 6.84 |
| PAC10 | -1.47 | 3.64 |
| IMT2 | -1.47 | 2.09 |
| KRS1 | -1.46 | 30.00 |
| YER160C | -1.46 | 30.00 |
| YJR029W | -1.46 | 30.00 |
| YNL284C-A | -1.46 | 30.00 |
| CTF8 | -1.46 | 13.82 |
| SND2 | -1.46 | 13.67 |
| ROK1 | -1.46 | 10.62 |
| TUB4 | -1.46 | 2.79 |
| YGR161C-D | -1.45 | 30.00 |
| SMC1 | -1.45 | 7.87 |
| YDR341C | -1.44 | 30.00 |
| MET6 | -1.44 | 30.00 |
| NRG2 | -1.44 | 16.62 |
| CWP2 | -1.44 | 7.70 |
| YNCL0036C | -1.44 | 3.20 |
| CYS3 | -1.43 | 30.00 |
| YPR158W-A | -1.43 | 30.00 |
| NOP14 | -1.42 | 30.00 |
| YDR210C-C | -1.42 | 30.00 |
| PEX21 | -1.42 | 30.00 |
| PCL5 | -1.42 | 30.00 |
| SNO1 | -1.42 | 30.00 |
| ASN1 | -1.42 | 30.00 |
| ELO1 | -1.42 | 21.52 |
| NUP188 | -1.42 | 14.09 |
| RPA43 | -1.42 | 12.73 |
| YNCM0020W | -1.42 | 2.52 |
| MNC1 | -1.41 | 30.00 |
| SAM1 | -1.41 | 30.00 |
| YML045W-A | -1.41 | 30.00 |
| YOR142W-A | -1.41 | 30.00 |
| HGH1 | -1.41 | 10.45 |
| PHO89 | -1.41 | 7.57 |
| THI80 | -1.41 | 6.83 |
| PUG1 | -1.41 | 6.60 |
| YDR316W-A | -1.40 | 30.00 |
| ARO9 | -1.40 | 20.92 |
| MTR3 | -1.40 | 10.26 |
| YCF1 | -1.39 | 30.00 |
| ELP3 | -1.39 | 16.97 |
| YCR016W | -1.39 | 13.61 |
| YGR240C-A | -1.39 | 7.47 |
| CTO1 | -1.39 | 7.37 |
| YGR035W-A | -1.39 | 6.61 |
| DTD1 | -1.39 | 5.24 |
| RHO2 | -1.39 | 4.28 |
| PBP2 | -1.39 | 3.25 |
| HIS1 | -1.38 | 30.00 |
| HNM1 | -1.38 | 30.00 |
| CYC1 | -1.38 | 30.00 |
| ERG8 | -1.38 | 22.72 |
| RRP3 | -1.38 | 22.19 |
| YBR012W-B | -1.37 | 30.00 |
| MIS1 | -1.37 | 30.00 |
| YDR098C-A | -1.37 | 30.00 |
| YER159C-A | -1.37 | 30.00 |
| ERG4 | -1.37 | 30.00 |
| COQ2 | -1.37 | 18.14 |
| ELP2 | -1.37 | 16.20 |
| MRX16 | -1.37 | 15.06 |
| FUI1 | -1.36 | 20.64 |
| PGU1 | -1.36 | 4.17 |
| YGR161C-C | -1.35 | 30.00 |
| GAR1 | -1.35 | 30.00 |
| ACO2 | -1.35 | 30.00 |
| YMR051C | -1.35 | 30.00 |
| PAC1 | -1.35 | 5.45 |
| RNR4 | -1.34 | 30.00 |
| YML131W | -1.34 | 30.00 |
| DAP1 | -1.34 | 30.00 |
| FUR1 | -1.34 | 15.54 |
| ASE1 | -1.34 | 14.01 |
| ANT1 | -1.34 | 7.38 |
| YNCI0002W | -1.34 | 2.49 |
| YLR179C | -1.32 | 30.00 |
| RRT2 | -1.32 | 7.67 |
| PAD1 | -1.32 | 7.35 |
| ALF1 | -1.32 | 3.11 |
| DIT1 | -1.32 | 2.26 |
| TYS1 | -1.31 | 20.25 |
| GIM3 | -1.31 | 13.75 |
| TRM9 | -1.31 | 11.45 |
| ARD1 | -1.31 | 3.36 |
| SRO9 | -1.31 | 3.31 |
| ASC1 | -1.30 | 30.00 |
| FAS2 | -1.30 | 30.00 |
| YGL007C-A | -1.30 | 14.39 |
| YDR034C-C | -1.30 | 9.00 |
| ARF3 | -1.30 | 7.71 |
| ARO4 | -1.29 | 30.00 |
| CPS1 | -1.29 | 30.00 |
| TOS1 | -1.29 | 10.80 |
| TDH3 | -1.28 | 30.00 |
| EGD2 | -1.28 | 30.00 |
| UBX6 | -1.28 | 30.00 |
| SHB17 | -1.28 | 30.00 |
| YNL054W-B | -1.28 | 30.00 |
| MTG1 | -1.28 | 20.71 |
| MAK16 | -1.28 | 18.65 |
| ENP2 | -1.28 | 15.89 |
| TCD1 | -1.28 | 9.59 |
| PIR5 | -1.28 | 5.48 |
| RNR2 | -1.27 | 30.00 |
| TRS20 | -1.27 | 12.96 |
| FMP42 | -1.27 | 12.35 |
| PRM10 | -1.27 | 7.52 |
| GIC2 | -1.27 | 2.79 |
| GRE2 | -1.26 | 30.00 |
| PDR5 | -1.26 | 30.00 |
| UTP23 | -1.26 | 16.78 |
| POR2 | -1.26 | 9.24 |
| DHR2 | -1.26 | 7.62 |
| HPA3 | -1.26 | 6.87 |
| YDL057W | -1.26 | 5.78 |
| RTT107 | -1.26 | 3.43 |
| TPA1 | -1.25 | 30.00 |
| YMC1 | -1.25 | 30.00 |
| ELO3 | -1.25 | 21.37 |
| MAK11 | -1.25 | 11.04 |
| YBR096W | -1.25 | 9.28 |
| NOP8 | -1.25 | 6.39 |
| CTF13 | -1.25 | 6.06 |
| SRD1 | -1.25 | 5.69 |
| PHO3 | -1.25 | 3.23 |
| YBL005W-B | -1.24 | 30.00 |
| VHT1 | -1.24 | 30.00 |
| NFU1 | -1.24 | 22.48 |
| HCA4 | -1.24 | 19.46 |
| SNX41 | -1.24 | 13.68 |
| KRE33 | -1.24 | 13.20 |
| YHR022C-A | -1.24 | 2.30 |
| GRS1 | -1.23 | 30.00 |
| SSZ1 | -1.23 | 30.00 |
| SCM4 | -1.23 | 18.19 |
| YCL020W | -1.23 | 8.33 |
| BNA4 | -1.23 | 7.07 |
| TRL1 | -1.23 | 7.01 |
| CAX4 | -1.23 | 6.62 |
| PGI1 | -1.22 | 30.00 |
| KRR1 | -1.22 | 22.47 |
| RPF1 | -1.22 | 21.65 |
| PUS7 | -1.22 | 16.97 |
| UTP21 | -1.22 | 13.41 |
| TIP1 | -1.22 | 10.38 |
| AIM14 | -1.22 | 10.00 |
| ELO2 | -1.22 | 5.89 |
| GPM1 | -1.21 | 30.00 |
| PFK2 | -1.21 | 30.00 |
| TRP2 | -1.21 | 23.31 |
| STB4 | -1.20 | 22.56 |
| PHO90 | -1.20 | 14.68 |
| RAM2 | -1.20 | 13.07 |
| RKM4 | -1.20 | 12.15 |
| DPP1 | -1.20 | 11.21 |
| URK1 | -1.20 | 10.71 |
| GSH2 | -1.20 | 8.22 |
| SER2 | -1.20 | 7.67 |
| SHH4 | -1.20 | 4.11 |
| URA2 | -1.19 | 30.00 |
| SCP160 | -1.19 | 5.41 |
| MIN4 | -1.19 | 4.31 |
| BUD8 | -1.19 | 2.73 |
| ILV1 | -1.18 | 30.00 |
| EGD1 | -1.18 | 30.00 |
| WRS1 | -1.18 | 19.96 |
| GSP1 | -1.18 | 18.90 |
| OPT2 | -1.18 | 6.18 |
| YBR238C | -1.18 | 2.76 |
| YLR264C-A | -1.17 | 30.00 |
| TSR3 | -1.17 | 10.47 |
| JLP2 | -1.17 | 5.26 |
| YMR122C | -1.17 | 2.24 |
| RPA34 | -1.16 | 30.00 |
| TIF1 | -1.16 | 30.00 |
| ACC1 | -1.16 | 30.00 |
| ADE4 | -1.16 | 19.46 |
| RRP36 | -1.16 | 8.71 |
| ARL1 | -1.16 | 7.25 |
| HAM1 | -1.16 | 4.93 |
| TMA19 | -1.15 | 30.00 |
| NOP56 | -1.15 | 30.00 |
| YNL134C | -1.15 | 30.00 |
| RTN1 | -1.15 | 22.71 |
| SDA1 | -1.15 | 15.96 |
| UTP8 | -1.15 | 12.22 |
| BNA5 | -1.15 | 10.52 |
| FAF1 | -1.15 | 8.28 |
| RPC25 | -1.15 | 7.09 |
| YSR3 | -1.15 | 6.57 |
| TRM3 | -1.15 | 6.32 |
| RPP1 | -1.15 | 4.49 |
| YNCM0025C | -1.15 | 2.42 |
| PGK1 | -1.14 | 30.00 |
| RPL10 | -1.14 | 30.00 |
| LTV1 | -1.14 | 17.98 |
| TPO1 | -1.14 | 16.15 |
| CIR2 | -1.14 | 10.84 |
| SDO1 | -1.14 | 10.26 |
| ADH4 | -1.14 | 8.10 |
| YNCN0008C | -1.14 | 4.12 |
| VMA22 | -1.14 | 3.88 |
| YOR238W | -1.14 | 3.62 |
| NOP58 | -1.13 | 30.00 |
| UTP11 | -1.13 | 15.00 |
| ECM16 | -1.13 | 12.26 |
| DAS2 | -1.13 | 8.74 |
| UBA2 | -1.13 | 7.12 |
| PAU6 | -1.13 | 3.22 |
| RIB3 | -1.12 | 30.00 |
| CCW12 | -1.12 | 30.00 |
| NOP15 | -1.12 | 17.70 |
| MAK21 | -1.12 | 16.99 |
| MOR1 | -1.12 | 13.53 |
| YCR043C | -1.12 | 11.15 |
| TOG1 | -1.12 | 9.46 |
| YJL107C | -1.12 | 7.08 |
| NRK1 | -1.12 | 6.92 |
| FLR1 | -1.12 | 6.71 |
| CIA2 | -1.11 | 30.00 |
| ARC1 | -1.11 | 18.49 |
| VMA5 | -1.11 | 18.37 |
| YHK8 | -1.11 | 9.32 |
| TRZ1 | -1.11 | 6.34 |
| TPC1 | -1.11 | 6.31 |
| RNA1 | -1.10 | 20.84 |
| DBP5 | -1.10 | 11.88 |
| NTO1 | -1.10 | 4.43 |
| RSR1 | -1.10 | 4.05 |
| SCW10 | -1.10 | 2.45 |
| ADE3 | -1.09 | 30.00 |
| PAN5 | -1.09 | 18.22 |
| NOC2 | -1.09 | 17.21 |
| SMP1 | -1.09 | 13.52 |
| TRM82 | -1.09 | 11.92 |
| STE4 | -1.09 | 9.40 |
| ARO7 | -1.09 | 7.05 |
| SPC25 | -1.09 | 6.53 |
| YGR050C | -1.09 | 4.34 |
| EMA17 | -1.09 | 2.74 |
| YNL054W-A | -1.08 | 30.00 |
| GUS1 | -1.08 | 23.58 |
| YBR012W-A | -1.08 | 19.90 |
| GCR1 | -1.08 | 6.39 |
| MDE1 | -1.08 | 5.13 |
| YBR016W | -1.08 | 3.37 |
| PDR12 | -1.07 | 30.00 |
| APT1 | -1.07 | 20.44 |
| OYE3 | -1.07 | 16.29 |
| AIR1 | -1.07 | 13.76 |
| SPC3 | -1.07 | 3.18 |
| YOR376W | -1.07 | 2.99 |
| TKL1 | -1.06 | 30.00 |
| YLR108C | -1.06 | 21.31 |
| ORT1 | -1.06 | 20.71 |
| HTS1 | -1.06 | 20.47 |
| LHP1 | -1.06 | 15.66 |
| PRP43 | -1.06 | 15.02 |
| RMT2 | -1.06 | 13.62 |
| YPR145C-A | -1.06 | 11.52 |
| FOL1 | -1.06 | 11.06 |
| NUP85 | -1.06 | 8.66 |
| EST3 | -1.06 | 6.72 |
| LSG1 | -1.06 | 6.06 |
| SPH1 | -1.06 | 4.23 |
| CDC19 | -1.05 | 30.00 |
| YMR045C | -1.05 | 30.00 |
| UTP10 | -1.05 | 14.96 |
| CAB1 | -1.05 | 14.86 |
| LOC1 | -1.05 | 10.39 |
| YPT31 | -1.05 | 9.06 |
| JJJ3 | -1.05 | 6.66 |
| BIO4 | -1.05 | 6.33 |
| YNL162W-A | -1.05 | 6.17 |
| CDC5 | -1.05 | 2.62 |
| TRR1 | -1.04 | 30.00 |
| SKP2 | -1.04 | 15.01 |
| TRM7 | -1.04 | 7.02 |
| ESF2 | -1.04 | 5.91 |
| SRB5 | -1.04 | 3.88 |
| DCD1 | -1.04 | 2.54 |
| IPP1 | -1.03 | 30.00 |
| SER3 | -1.03 | 30.00 |
| NOP10 | -1.03 | 30.00 |
| CCS1 | -1.03 | 30.00 |
| MEP2 | -1.03 | 30.00 |
| SAM3 | -1.03 | 30.00 |
| SES1 | -1.03 | 22.91 |
| EBP2 | -1.03 | 20.28 |
| MRD1 | -1.03 | 14.20 |
| CIR1 | -1.03 | 13.75 |
| CGR1 | -1.03 | 13.16 |
| TMA20 | -1.03 | 7.12 |
| OCA2 | -1.03 | 5.99 |
| KTR5 | -1.03 | 4.33 |
| IRC4 | -1.03 | 3.85 |
| YPL108W | -1.03 | 3.24 |
| SFH5 | -1.03 | 2.74 |
| HIS4 | -1.02 | 30.00 |
| MET16 | -1.02 | 30.00 |
| NSA2 | -1.02 | 18.01 |
| VRG4 | -1.02 | 17.31 |
| DRS1 | -1.02 | 13.80 |
| MYG1 | -1.02 | 9.01 |
| EFM5 | -1.02 | 8.42 |
| RPE1 | -1.02 | 7.41 |
| COG1 | -1.02 | 6.63 |
| SNM1 | -1.02 | 5.68 |
| YGL039W | -1.02 | 5.00 |
| GRX8 | -1.02 | 4.82 |
| MMT1 | -1.02 | 4.67 |
| SPO21 | -1.02 | 3.20 |
| YNCO0021C | -1.02 | 2.86 |
| YEL068C | -1.02 | 2.82 |
| SRY1 | -1.01 | 23.06 |
| PUS1 | -1.01 | 20.90 |
| SPB1 | -1.01 | 11.56 |
| PXR1 | -1.01 | 7.49 |
| TMA23 | -1.01 | 4.08 |
| MPC2 | -1.00 | 30.00 |
| ISU2 | -1.00 | 30.00 |
| ZUO1 | -1.00 | 18.20 |
| CDC10 | -1.00 | 9.53 |
| CRS1 | -1.00 | 8.79 |
| YMR265C | -1.00 | 6.64 |
| TEM1 | -1.00 | 2.89 |

a) -Log10 (p-value) greater than 30 is indicated as 30.
